# Supplementary material for: Temporal and regional trends in Ischemic Heart Disease mortality associated with Anxiety - A nationwide analysis from 1999 to 2023 in the United States
Source: Research Square preprint supplement (doi:10.21203/rs.3.rs-8005563/v1), 2025-12-08
Supplement: Supplementary file 1 [file c6efe3e847fa679221957e39.docx]

**Supplementary File:**

**Section 1: IHD and Anxiety**

| **Table 1:** Frequency and age-adjusted mortality rates per 100,000 deaths in adults aged 25+ in the United States, 1999 to 2023 | | |
| --- | --- | --- |
|  | **Deaths** | **Population** |
| Entire Cohort | 10552 | 5163131262 |
| ***Sex*** | | |
| Male | 3928 | 2491041251 |
| Female | 6624 | 2672090011 |
| ***Race*** | | |
| NH Black or African American | 483 | 602204655 |
| NH White | 9487 | 3528912956 |
| Hispanic | 421 | 702028728 |
| NH Others | 140 | 329,984,923 |
| ***Census region*** | | |
| Northeast | 2031 | 948225258 |
| Midwest | 3205 | 1110999093 |
| South | 3633 | 1916380109 |
| West | 1683 | 1187526802 |
| ***Urbanization*** | | |
| Large Central Metro | 1456 | 1364782777 |
| Large Fringe Metro | 1712 | 1107354420 |
| Medium Metro | 1765 | 918036376 |
| Small Metro | 1012 | 405040249 |
| Micropolitan (Nonmetro) | 1212 | 392223879 |
| NonCore (Nonmetro) | 1126 | 286410290 |

NH: Non-Hispanics

**Supplementary Table 1:** Frequency and age-adjusted mortality rates per 100,000 deaths in adults aged 25+ in the United States, 1999 to 2023

| **Table 2:** Annual age-adjusted mortality rates per 100,000 deaths in adults aged 25+ in the United States, 1999 to 2023 | |
| --- | --- |
| **Year** | **Age Adjusted Mortality Rate per 100,000 deaths (95% CI)** |
| 1999 | 0.1422(0.1243 -0.16) |
| 2000 | 0.1454(0.1273 -0.1635) |
| 2001 | 0.1355(0.1189 -0.1521) |
| 2002 | 0.1469(0.1295 -0.1643) |
| 2003 | 0.14(0.1229 -0.1571) |
| 2004 | 0.1406(0.1234 -0.1578) |
| 2005 | 0.1283(0.1125 -0.144) |
| 2006 | 0.1237(0.1084 -0.1391) |
| 2007 | 0.1213(0.106 -0.1367) |
| 2008 | 0.1355(0.12 -0.151) |
| 2009 | 0.1539(0.1363 -0.1716) |
| 2010 | 0.1515(0.1343 -0.1688) |
| 2011 | 0.1377(0.1225 -0.1529) |
| 2012 | 0.1542(0.1379 -0.1705) |
| 2013 | 0.1761(0.1584 -0.1938) |
| 2014 | 0.1759(0.1588 -0.1929) |
| 2015 | 0.1876(0.1695 -0.2057) |
| 2016 | 0.1944(0.1761 -0.2127) |
| 2017 | 0.199(0.1815 -0.2165) |
| 2018 | 0.2179(0.1993 -0.2365) |
| 2019 | 0.2377(0.2184 -0.257) |
| 2020 | 0.2518(0.2327 -0.2709) |
| 2021 | 0.2677(0.2478 -0.2877) |
| 2022 | 0.2794(0.2597 -0.2992) |
| 2023 | 0.2638(0.2446 -0.283) |

**Supplementary Table 2:** Annual age-adjusted mortality rates per 100,000 deaths in adults aged 25+ in the United States, 1999 to 2023

| **Table 3:** Age-adjusted mortality rates per 100,000 deaths stratified by sex in adults aged 25+ in the United States, 1999 to 2022 | | |
| --- | --- | --- |
|  | **Age-Adjusted Mortality Rate per 100,000 deaths (95% CI)** | |
| **Year** | **Female** | **Male** |
| 1999 | 0.1665(0.1414-0.1916) | 0.1058(0.0823-0.1339) |
| 2000 | 0.1574(0.1334-0.1814) | 0.1214(0.0958-0.1518) |
| 2001 | 0.1694(0.1455-0.1934) | 0.083(0.0633-0.1068) |
| 2002 | 0.1692(0.1447-0.1936) | 0.1182(0.0941-0.1465) |
| 2003 | 0.1644(0.14-0.1887) | 0.1094(0.0859-0.1373) |
| 2004 | 0.1596(0.1364-0.1827) | 0.0947(0.0737-0.1199) |
| 2005 | 0.1355(0.1152-0.1558) | 0.1115(0.0885-0.1386) |
| 2006 | 0.1403(0.1186-0.162) | 0.1161(0.093-0.1432) |
| 2007 | 0.1229(0.1024-0.1433) | 0.1302(0.1045-0.156) |
| 2008 | 0.1574(0.1353-0.1796) | 0.119(0.0946-0.1433) |
| 2009 | 0.1705(0.1461-0.1948) | 0.1139(0.0906-0.1373) |
| 2010 | 0.1633(0.1401-0.1864) | 0.1281(0.103-0.1531) |
| 2011 | 0.1689(0.1451-0.1928) | 0.1163(0.0942-0.1385) |
| 2012 | 0.171(0.1485-0.1934) | 0.1443(0.1191-0.1696) |
| 2013 | 0.1905(0.1662-0.2148) | 0.1632(0.1366-0.1898) |
| 2014 | 0.1972(0.1732-0.2212) | 0.1515(0.1271-0.1759) |
| 2015 | 0.1972(0.1729-0.2215) | 0.1626(0.1376-0.1877) |
| 2016 | 0.1975(0.1732-0.2217) | 0.1728(0.1461-0.1996) |
| 2017 | 0.2131(0.1884-0.2378) | 0.1728(0.1486-0.1971) |
| 2018 | 0.2416(0.2155-0.2677) | 0.1924(0.1653-0.2194) |
| 2019 | 0.2232(0.1996-0.2467) | 0.2164(0.189-0.2438) |
| 2020 | 0.2779(0.2517-0.3042) | 0.2215(0.1931-0.2499) |
| 2021 | 0.2842(0.2563-0.3122) | 0.2431(0.2144-0.2719) |
| 2022 | 0.2936(0.2665-0.3206) | 0.2674(0.2373-0.2976) |
| 2023 | 0.2758(0.2497-0.3019) | 0.2618(0.2318-0.2917) |

**Supplementary Table 3:** Age-adjusted mortality rates per 100,000 deaths stratified by sex in adults aged 25+ in the United States, 1999 to 2023

| **Table 4:** Age-adjusted mortality rates per 100,000 deaths stratified by race in adults aged 25+ in the United States, 1999 to 2023 | |
| --- | --- |
|  | **Age Adjusted Mortality Rate per 100,000 deaths (95% CI)** |
| **Year** | **NH White** |
| 1999 | 0.1539(0.134-0.1738) |
| 2000 | 0.1596(0.1391-0.18) |
| 2001 | 0.1709(0.1495-0.1924) |
| 2002 | 0.1665(0.1461-0.1868) |
| 2003 | 0.155(0.1351-0.1749) |
| 2004 | 0.1524(0.1332-0.1715) |
| 2005 | 0.1478(0.1288-0.1669) |
| 2006 | 0.1379(0.1201-0.1556) |
| 2007 | 0.1515(0.1314-0.1717) |
| 2008 | 0.1598(0.1404-0.1792) |
| 2009 | 0.1587(0.1397-0.1778) |
| 2010 | 0.1633(0.144-0.1825) |
| 2011 | 0.162(0.1432-0.1808) |
| 2012 | 0.1842(0.1639-0.2045) |
| 2013 | 0.2062(0.1846-0.2277) |
| 2014 | 0.2161(0.1941-0.2381) |
| 2015 | 0.2107(0.1896-0.2318) |
| 2016 | 0.2086(0.1874-0.2297) |
| 2017 | 0.2392(0.217-0.2613) |
| 2018 | 0.2629(0.2396-0.2862) |
| 2019 | 0.2842(0.2603-0.3082) |
| 2020 | 0.2858(0.2626-0.3089) |
| 2021 | 0.3119(0.287-0.3367) |
| 2022 | 0.3362(0.3109-0.3615) |
| 2023 | 0.323(0.2982-0.3478) |
|  |  |

**Supplementary Table 4:** Age-adjusted mortality rates per 100,000 deaths stratified by race in adults aged 25+ in the United States, 1999 to 2023

| **Table 5:** Age-adjusted mortality rates per 100,000 deaths stratified by census region in adults aged 25+ in the United States, 1999 to 2023 | | | | |
| --- | --- | --- | --- | --- |
| **Age Adjusted Mortality Rate per 100,000 deaths (95% CI)** | | | | |
| **Year** | **Northeast** | **Midwest** | **South** | **West** |
| 1999 | 0.1271(0.0934-0.1691) | 0.2248(0.1803-0.2693) | 0.1058(0.0817-0.1349) | 0.0998(0.0687-0.1401) |
| 2000 | 0.1517(0.1152-0.1962) | 0.2139(0.1725-0.2624) | 0.1067(0.0827-0.1355) | 0.0887(0.0602-0.1259) |
| 2001 | 0.1418(0.1068-0.1846) | 0.2024(0.1628-0.2488) | 0.1166(0.0921-0.1455) | 0.1024(0.0709-0.1431) |
| 2002 | 0.1418(0.1056-0.1864) | 0.2098(0.1689-0.2575) | 0.1569(0.1259-0.1879) | 0.0869(0.0586-0.124) |
| 2003 | 0.107(0.0757-0.1468) | 0.2284(0.1836-0.2733) | 0.1331(0.1064-0.1644) | 0.0835(0.0575-0.1173) |
| 2004 | 0.1219(0.0867-0.1666) | 0.2122(0.1716-0.2594) | 0.128(0.1021-0.1585) | 0.0917(0.0635-0.1281) |
| 2005 | 0.1094(0.0785-0.1484) | 0.192(0.1542-0.2363) | 0.1172(0.0922-0.1469) | 0.1196(0.0875-0.1595) |
| 2006 | 0.0854(0.0576-0.122) | 0.2114(0.1704-0.2525) | 0.1024(0.0807-0.1282) | 0.1054(0.0753-0.1436) |
| 2007 | 0.1209(0.0867-0.164) | 0.1731(0.1372-0.2154) | 0.1018(0.0805-0.1271) | 0.107(0.0771-0.1446) |
| 2008 | 0.1022(0.0742-0.1372) | 0.2251(0.1813-0.2689) | 0.1346(0.1079-0.1612) | 0.1048(0.0773-0.139) |
| 2009 | 0.1031(0.0752-0.1379) | 0.2137(0.172-0.2554) | 0.1425(0.1158-0.1691) | 0.0757(0.0527-0.1053) |
| 2010 | 0.1274(0.0936-0.1694) | 0.2092(0.1696-0.2488) | 0.1305(0.1047-0.1562) | 0.0974(0.0696-0.1326) |
| 2011 | 0.15(0.1147-0.1927) | 0.1992(0.1583-0.2402) | 0.1266(0.1018-0.1513) | 0.1233(0.0923-0.1612) |
| 2012 | 0.1764(0.1383-0.2218) | 0.2338(0.1918-0.2758) | 0.1353(0.1097-0.1608) | 0.1189(0.0896-0.1548) |
| 2013 | 0.1959(0.1561-0.2429) | 0.2212(0.1786-0.2637) | 0.1846(0.1551-0.2141) | 0.1142(0.0848-0.1506) |
| 2014 | 0.2052(0.1658-0.2511) | 0.2453(0.2031-0.2874) | 0.1539(0.1274-0.1804) | 0.1094(0.0835-0.1408) |
| 2015 | 0.1918(0.1525-0.2381) | 0.2284(0.1879-0.2688) | 0.1912(0.1611-0.2214) | 0.1326(0.1014-0.1703) |
| 2016 | 0.179(0.1434-0.2208) | 0.2662(0.2218-0.3107) | 0.1776(0.1495-0.2057) | 0.1368(0.1053-0.1746) |
| 2017 | 0.2016(0.1627-0.247) | 0.2344(0.195-0.2739) | 0.1776(0.15-0.2053) | 0.2017(0.1633-0.2402) |
| 2018 | 0.2693(0.2251-0.3136) | 0.2398(0.1974-0.2822) | 0.1972(0.1684-0.2259) | 0.1692(0.1366-0.2073) |
| 2019 | 0.2401(0.1956-0.2847) | 0.2746(0.2316-0.3177) | 0.2018(0.174-0.2296) | 0.2046(0.1673-0.2419) |
| 2020 | 0.3079(0.2591-0.3567) | 0.2909(0.2478-0.3341) | 0.2416(0.2113-0.2719) | 0.1774(0.1423-0.2185) |
| 2021 | 0.2454(0.2005-0.2903) | 0.3365(0.2889-0.384) | 0.272(0.2391-0.3049) | 0.2094(0.1696-0.2493) |
| 2022 | 0.2488(0.2059-0.2916) | 0.416(0.3619-0.47) | 0.2862(0.2521-0.3203) | 0.1946(0.1609-0.2284) |
| 2023 | 0.2667(0.2225-0.3108) | 0.3855(0.3295-0.4414) | 0.2935(0.2577-0.3293) | 0.2092(0.172-0.2463) |

**Supplementary Table 5:** Age-adjusted mortality rates per 100,000 deaths stratified by Census Region in adults aged 25+ in the United States, 1999 to 2023

| **Table 6:** State-wise age-adjusted mortality rates per 100,000 deaths in adults aged 25+ in the United States, 1999 to 2020 | |
| --- | --- |
| **State** | **Age Adjusted Mortality Rate per 100,000 deaths (95% CI)**  **1999-2020** |
|
| Alabama | 0.1(0.08-0.13) |
| Alaska | 0.08(0.06-0.1) |
| Arizona | 0.22(0.17-0.26) |
| Arkansas | 0.15(0.14-0.16) |
| California | 0.09(0.07-0.12) |
| Colorado | 0.09(0.07-0.11) |
| Connecticut | Unreliable(0.05-0.15) |
| Delaware | 0.09(0.08-0.1) |
| District of Columbia | 0.08(0.06-0.09) |
| Florida | Unreliable(0.04-0.11) |
| Georgia | 0.15(0.1-0.21) |
| Hawaii | 0.15(0.13-0.17) |
| Idaho | 0.28(0.25-0.31) |
| Illinois | 0.32(0.27-0.36) |
| Indiana | 0.18(0.14-0.22) |
| Iowa | 0.2(0.17-0.23) |
| Kansas | 0.18(0.15-0.22) |
| Kentucky | 0.24(0.18-0.31) |
| Louisiana | 0.13(0.11-0.16) |
| Maine | 0.08(0.06-0.1) |
| Maryland | 0.12(0.1-0.13) |
| Massachusetts | 0.25(0.22-0.28) |
| Michigan | 0.34(0.28-0.39) |
| Minnesota | 0.25(0.22-0.28) |
| Mississippi | 0.15(0.09-0.23) |
| Missouri | 0.18(0.14-0.24) |
| Montana | Unreliable(0.02-0.06) |
| Nebraska | 0.19(0.14-0.26) |
| Nevada | 0.18(0.16-0.21) |
| New Hampshire | 0.08(0.05-0.12) |
| New Jersey | 0.15(0.13-0.16) |
| New Mexico | 0.16(0.14-0.18) |
| New York | 0.37(0.26-0.5) |
| North Carolina | 0.38(0.36-0.41) |
| North Dakota | 0.2(0.17-0.24) |
| Ohio | 0.17(0.13-0.2) |
| Oklahoma | 0.22(0.2-0.23) |
| Oregon | 0.35(0.27-0.45) |
| Pennsylvania | 0.25(0.21-0.29) |
| Rhode Island | 0.24(0.17-0.33) |
| South Carolina | 0.23(0.2-0.26) |
| South Dakota | 0.14(0.13-0.16) |
| Tennessee | 0.06(0.04-0.1) |
| Texas | 0.29(0.19-0.42) |
| Utah | 0.15(0.13-0.17) |
| Vermont | 0.12(0.1-0.14) |
| Virginia | 0.46(0.38-0.53) |
| Washington | 0.13(0.1-0.15) |
| West Virginia | 0.27(0.17-0.4) |
| Wisconsin | 0.1(0.08-0.13) |
| Wyoming | 0.08(0.06-0.1) |

**Supplementary Table 6:** State-wise age-adjusted mortality rates per 100,000 deaths in adults aged 25+ in the United States, 1999 to 2020

| **Table 7:** Age-adjusted mortality rates per 100,000 deaths stratified by urbanization in adults aged 25+ in the United States, 1999 to 2020 | | | | | | |
| --- | --- | --- | --- | --- | --- | --- |
| **Age Adjusted Mortality Rate per 100,000 deaths (95% CI)** | | | | | | |
| **Year** | **Large Central Metro** | **Large Fringe Metro** | **Medium Metro** | **Small Metro** | **Micropolitan (Nonmetro)** | **NonCore (Nonmetro)** |
| 1999 | 0.0922(0.0665-0.1246) | 0.116(0.0836-0.1568) | 0.1534(0.1152-0.2001) | 0.2076(0.1446-0.2888) | 0.2377(0.172-0.3202) | 0.1787(0.1188-0.2583) |
| 2000 | 0.1007(0.0742-0.1335) | 0.1415(0.1069-0.1838) | 0.1559(0.1161-0.205) | 0.2068(0.1423-0.2904) | 0.1578(0.1057-0.2267) | 0.2105(0.1449-0.2957) |
| 2001 | 0.1096(0.0819-0.1438) | 0.1177(0.0871-0.1556) | 0.1355(0.0992-0.1807) | 0.1778(0.119-0.2553) | 0.3148(0.2351-0.4129) | 0.1799(0.1185-0.2617) |
| 2002 | 0.0989(0.0732-0.1307) | 0.1371(0.103-0.1789) | 0.1548(0.1166-0.2014) | 0.1933(0.1354-0.2676) | 0.2365(0.169-0.3221) | 0.2722(0.1962-0.3679) |
| 2003 | 0.0815(0.0582-0.1109) | 0.1039(0.0764-0.1382) | 0.1233(0.0892-0.166) | 0.2278(0.1642-0.3079) | 0.2394(0.1759-0.3184) | 0.2735(0.1963-0.3711) |
| 2004 | 0.0893(0.0656-0.1187) | 0.1202(0.0892-0.1585) | 0.1208(0.0888-0.1607) | 0.2216(0.1561-0.3055) | 0.1816(0.1265-0.2525) | 0.2414(0.1708-0.3314) |
| 2005 | 0.0598(0.0414-0.0836) | 0.1222(0.0916-0.1599) | 0.1358(0.1031-0.1756) | 0.177(0.1186-0.2543) | 0.2108(0.1499-0.2882) | 0.2627(0.1885-0.3564) |
| 2006 | 0.0778(0.0561-0.1052) | 0.1168(0.0875-0.1528) | 0.1248(0.0907-0.1675) | 0.1747(0.1203-0.2454) | 0.2593(0.1924-0.3418) | 0.195(0.1334-0.2753) |
| 2007 | 0.07(0.049-0.0969) | 0.092(0.0663-0.1243) | 0.1259(0.0934-0.166) | 0.1447(0.0969-0.2078) | 0.2147(0.1553-0.2891) | 0.2446(0.1755-0.3318) |
| 2008 | 0.1039(0.0783-0.1353) | 0.1176(0.0883-0.1534) | 0.1259(0.0951-0.1635) | 0.1765(0.1249-0.2423) | 0.2663(0.2017-0.345) | 0.2213(0.1558-0.305) |
| 2009 | 0.0661(0.046-0.0919) | 0.1268(0.097-0.1628) | 0.1341(0.1021-0.173) | 0.1663(0.1171-0.2292) | 0.2027(0.1461-0.2739) | 0.3429(0.2553-0.4508) |
| 2010 | 0.0661(0.046-0.0919) | 0.1111(0.0827-0.1461) | 0.1381(0.1059-0.1771) | 0.2016(0.1412-0.2792) | 0.2367(0.1733-0.3158) | 0.329(0.2486-0.4273) |
| 2011 | 0.0928(0.0693-0.1217) | 0.1287(0.0989-0.1647) | 0.1427(0.1101-0.1819) | 0.187(0.1323-0.2566) | 0.2119(0.1573-0.2794) | 0.2686(0.1959-0.3595) |
| 2012 | 0.0976(0.0748-0.1252) | 0.147(0.1134-0.1874) | 0.1512(0.1187-0.1898) | 0.2185(0.1588-0.2934) | 0.2301(0.1672-0.3089) | 0.3612(0.2729-0.4691) |
| 2013 | 0.1135(0.0882-0.1439) | 0.1633(0.1293-0.2035) | 0.1641(0.1304-0.204) | 0.1743(0.1214-0.2423) | 0.2754(0.2107-0.3538) | 0.3668(0.2805-0.4711) |
| 2014 | 0.1163(0.0912-0.1462) | 0.1817(0.146-0.2173) | 0.1857(0.1489-0.2288) | 0.1817(0.132-0.2439) | 0.262(0.1979-0.3402) | 0.2796(0.2061-0.3707) |
| 2015 | 0.0898(0.0684-0.1159) | 0.1756(0.1408-0.2164) | 0.2064(0.1677-0.2452) | 0.2751(0.2055-0.3607) | 0.3001(0.2273-0.3888) | 0.3538(0.2658-0.4616) |
| 2016 | 0.1096(0.0859-0.1378) | 0.1711(0.1384-0.2091) | 0.1669(0.1331-0.2007) | 0.2554(0.1944-0.3294) | 0.2716(0.2078-0.3489) | 0.3257(0.2461-0.423) |
| 2017 | 0.1418(0.1131-0.1705) | 0.1644(0.132-0.1968) | 0.2363(0.1957-0.2769) | 0.1731(0.1248-0.234) | 0.2952(0.2235-0.3824) | 0.3783(0.2894-0.486) |
| 2018 | 0.1475(0.119-0.176) | 0.1877(0.1543-0.2211) | 0.2329(0.191-0.2748) | 0.248(0.1888-0.3199) | 0.2542(0.1944-0.3265) | 0.396(0.3115-0.4964) |
| 2019 | 0.1507(0.1225-0.179) | 0.1755(0.1432-0.2078) | 0.2256(0.1869-0.2642) | 0.3283(0.2582-0.4115) | 0.352(0.2769-0.4413) | 0.4127(0.3235-0.5189) |
| 2020 | 0.1625(0.1333-0.1916) | 0.247(0.2078-0.2863) | 0.255(0.2104-0.2997) | 0.3156(0.2521-0.3903) | 0.4257(0.341-0.5251) | 0.4421(0.35-0.551) |

**Supplementary Table 7:** Age-adjusted mortality rates per 100,000 deaths stratified by urbanization in adults aged 25+ in the United States, 1999 to 2020

**Section 2: IHD**

| **Table 8:** Frequency and age-adjusted mortality rates per 100,000 deaths in adults aged 25+ in the United States, 1999 to 2023 | | |
| --- | --- | --- |
|  | **Deaths** | **Population** |
| Entire Cohort | 10200362 | 5163131262 |
| ***Sex*** |  |  |
| Male | 5598906 | 2491041251 |
| Female | 4601456 | 2672090011 |
| ***Race*** |  |  |
| NH American Indian or Alaska Native | 46736 | 37910158 |
| NH White | 8260439 | 3528912956 |
| Hispanic | 563283 | 702028728 |
| NH Asian or Pacific Islander | 212492 | 329,984,923 |
| NH Black or African American | 1078856 | 602204655 |
| ***Census region*** |  |  |
| Northeast | 2177581 | 948225258 |
| Midwest | 2339054 | 1110999093 |
| South | 3736179 | 1916380109 |
| West | 1947548 | 1187526802 |
| ***Urbanization*** |  |  |
| Large Central Metro | 2616151 | 1364782777 |
| Large Fringe Metro | 2034062 | 1107354420 |
| Medium Metro | 1820731 | 918036376 |
| Small Metro | 871101 | 405040249 |
| Micropolitan (Nonmetro) | 970179 | 392223879 |
| NonCore (Nonmetro) | 792127 | 286410290 |

NH: Non-Hispanics

**Supplementary Table 8:** Frequency and age-adjusted mortality rates per 100,000 deaths in adults aged 25+ in the United States, 1999 to 2023

| **Table 9:** Annual age-adjusted mortality rates per 100,000 deaths in adults aged 25+ in the United States, 1999 to 2023 | |
| --- | --- |
| **Year** | **Age Adjusted Mortality Rate per 100,000 deaths (95% CI)** |
| 1999 | 300.8(299.99-301.61) |
| 2000 | 288.71(287.93-289.5) |
| 2001 | 276.64(275.87-277.4) |
| 2002 | 268.22(267.48-268.97) |
| 2003 | 255.88(255.16-256.61) |
| 2004 | 236.9(236.2-237.59) |
| 2005 | 229.01(228.34-229.68) |
| 2006 | 213.84(213.2-214.49) |
| 2007 | 199.74(199.13-200.36) |
| 2008 | 194.97(194.37-195.57) |
| 2009 | 181.97(181.39-182.54) |
| 2010 | 175.67(175.11-176.23) |
| 2011 | 168.76(168.21-169.3) |
| 2012 | 162.97(162.44-163.5) |
| 2013 | 158.67(158.15-159.18) |
| 2014 | 152.75(152.25-153.26) |
| 2015 | 150.29(149.8-150.78) |
| 2016 | 145.83(145.35-146.31) |
| 2017 | 143.56(143.09-144.03) |
| 2018 | 140.43(139.97-140.89) |
| 2019 | 135.98(135.53-136.43) |
| 2020 | 141.91(141.45-142.36) |
| 2021 | 143.38(142.91-143.84) |
| 2022 | 135.4(134.96-135.84) |
| 2023 | 127.07(126.64-127.49) |

**Supplementary Table 9:** Annual age-adjusted mortality rates per 100,000 deaths in adults aged 25+ in the United States, 1999 to 2023

| **Table 10:** Age-adjusted mortality rates per 100,000 deaths stratified by sex in adults aged 25+ in the United States, 1999 to 2022 | | |
| --- | --- | --- |
|  | **Age-Adjusted Mortality Rate per 100,000 deaths (95% CI)** | |
| **Year** | **Female** | **Male** |
| 1999 | 236.43(235.52-237.34) | 388.34(386.84-389.85) |
| 2000 | 226.45(225.56-227.33) | 373.16(371.7-374.63) |
| 2001 | 217.84(216.97-218.7) | 355.84(354.42-357.25) |
| 2002 | 209.75(208.91-210.59) | 347.29(345.91-348.68) |
| 2003 | 200.04(199.23-200.86) | 330.65(329.31-331.98) |
| 2004 | 184.61(183.83-185.39) | 306.74(305.47-308.01) |
| 2005 | 177.81(177.05-178.57) | 297.3(296.07-298.54) |
| 2006 | 164.27(163.54-164.99) | 279.35(278.18-280.53) |
| 2007 | 152.66(151.96-153.35) | 261.58(260.46-262.7) |
| 2008 | 148.96(148.28-149.64) | 255.23(254.13-256.32) |
| 2009 | 136.67(136.02-137.32) | 241.48(240.43-242.53) |
| 2010 | 131.19(130.56-131.82) | 233.83(232.81-234.85) |
| 2011 | 125.26(124.65-125.87) | 225(224.01-225.99) |
| 2012 | 120.25(119.66-120.84) | 218.05(217.09-219) |
| 2013 | 115.81(115.24-116.39) | 213.59(212.66-214.52) |
| 2014 | 110.77(110.21-111.33) | 206.32(205.42-207.23) |
| 2015 | 108.99(108.44-109.53) | 202.74(201.86-203.63) |
| 2016 | 104.42(103.89-104.96) | 198.35(197.49-199.22) |
| 2017 | 101.94(101.42-102.46) | 196(195.15-196.85) |
| 2018 | 98.94(98.44-99.45) | 192.48(191.66-193.31) |
| 2019 | 95.36(94.87-95.86) | 186.83(186.02-187.63) |
| 2020 | 99.03(98.53-99.53) | 195.07(194.26-195.89) |
| 2021 | 100.06(99.54-100.57) | 196.86(196.03-197.7) |
| 2022 | 93.17(92.69-93.65) | 188.43(187.64-189.23) |
| 2023 | 87.76(87.29-88.22) | 175.5(174.73-176.26) |

**Supplementary Table 10:** Age-adjusted mortality rates per 100,000 deaths stratified by sex in adults aged 25+ in the United States, 1999 to 2023

| **Table 11:** Age-adjusted mortality rates per 100,000 deaths stratified by race in adults aged 25+ in the United States, 1999 to 2023 | | | | | |
| --- | --- | --- | --- | --- | --- |
| **Age Adjusted Mortality Rate per 100,000 deaths (95% CI)** | | | | | |
| **Year** | **Hispanic or Latino** | **NH American Indian or Alaska Native** | **NH Asian or Pacific Islander** | **NH Black or African American** | **NH White** |
| 1999 | 250.7(247.08-254.33) | 240.98(228.75-253.21) | 181.37(176.8-185.94) | 350.26(347.2-353.33) | 300.41(299.53-301.29) |
| 2000 | 236.87(233.43-240.31) | 220.45(209.34-231.55) | 169.5(165.26-173.75) | 340.67(337.66-343.67) | 288.52(287.66-289.38) |
| 2001 | 233.51(230.2-236.83) | 209.47(198.81-220.13) | 161.58(157.61-165.55) | 332.24(329.29-335.18) | 276.02(275.19-276.86) |
| 2002 | 223.77(220.6-226.93) | 218.19(207.3-229.08) | 158.13(154.33-161.94) | 322.24(319.35-325.12) | 267.81(266.99-268.63) |
| 2003 | 211.47(208.47-214.47) | 221.8(211.01-232.59) | 149.16(145.58-152.74) | 310.32(307.51-313.13) | 255.77(254.97-256.56) |
| 2004 | 196.91(194.1-199.73) | 214.59(203.96-225.22) | 136.36(133.03-139.68) | 287.46(284.78-290.15) | 237.07(236.31-237.83) |
| 2005 | 197.61(194.88-200.35) | 194.84(185-204.68) | 132.48(129.34-135.61) | 275.31(272.72-277.9) | 229.21(228.47-229.96) |
| 2006 | 179.93(177.39-182.47) | 197.39(187.65-207.13) | 127.25(124.27-130.24) | 259.62(257.14-262.11) | 214.24(213.53-214.95) |
| 2007 | 166.25(163.88-168.62) | 180.68(171.53-189.84) | 117.69(114.91-120.48) | 241.89(239.52-244.26) | 200.77(200.08-201.45) |
| 2008 | 155.86(153.63-158.09) | 166.95(158.35-175.55) | 117.66(114.96-120.36) | 230.77(228.48-233.05) | 196.97(196.3-197.65) |
| 2009 | 146.39(144.3-148.49) | 166.67(158.26-175.08) | 109.68(107.15-112.2) | 216(213.82-218.17) | 183.79(183.14-184.43) |
| 2010 | 142.66(140.63-144.69) | 164.23(155.97-172.49) | 106.59(104.14-109.03) | 206.23(204.12-208.33) | 177.71(177.07-178.34) |
| 2011 | 130.11(128.26-131.96) | 161.97(154.06-169.89) | 97.66(95.44-99.89) | 197.71(195.69-199.73) | 171.71(171.09-172.32) |
| 2012 | 125.29(123.53-127.05) | 157.25(149.71-164.79) | 94.21(92.1-96.32) | 190.67(188.72-192.62) | 166(165.4-166.61) |
| 2013 | 124.21(122.51-125.91) | 155.22(147.94-162.51) | 93.21(91.18-95.23) | 185.32(183.44-187.21) | 161.67(161.08-162.26) |
| 2014 | 116.35(114.76-117.94) | 151.14(144.18-158.1) | 85.51(83.64-87.37) | 177.35(175.53-179.16) | 156.36(155.79-156.94) |
| 2015 | 115.24(113.7-116.77) | 147.06(140.37-153.74) | 85.16(83.37-86.96) | 171.9(170.14-173.65) | 154.1(153.53-154.67) |
| 2016 | 112.34(110.86-113.82) | 144.14(137.65-150.62) | 82.33(80.61-84.05) | 171.26(169.54-172.99) | 149.36(148.8-149.91) |
| 2017 | 109.27(107.85-110.69) | 135.66(129.51-141.8) | 83.45(81.77-85.12) | 165.71(164.04-167.38) | 147.64(147.09-148.19) |
| 2018 | 106.82(105.45-108.18) | 129.66(123.85-135.46) | 82.04(80.43-83.66) | 163.32(161.69-164.95) | 144.51(143.97-145.05) |
| 2019 | 104.76(103.43-106.08) | 122.31(116.78-127.84) | 78.66(77.12-80.2) | 158.37(156.79-159.95) | 140.12(139.59-140.64) |
| 2020 | 116.82(115.45-118.18) | 126.34(120.85-131.84) | 86.9(85.32-88.48) | 176.8(175.15-178.44) | 143.78(143.25-144.31) |
| 2021 | 109.13(107.81-110.45) | 126.32(120.61-132.03) | 83.4(81.83-84.97) | 170.75(169.11-172.39) | 148.71(148.16-149.27) |
| 2022 | 102.31(101.06-103.55) | 118.21(112.87-123.54) | 80.4(78.91-81.88) | 161.25(159.69-162.82) | 140.58(140.06-141.11) |
| 2023 | 93.39(92.22-94.56) | 112.11(106.98-117.24) | 72.62(71.24-74) | 148.34(146.85-149.83) | 132.95(132.43-133.46) |
|  |  |  |  |  |  |

**Supplementary Table 11:** Age-adjusted mortality rates per 100,000 deaths stratified by race in adults aged 25+ in the United States, 1999 to 2023

| **Table 12:** Age-adjusted mortality rates per 100,000 deaths stratified by census region in adults aged 25+ in the United States, 1999 to 2023 | | | | |
| --- | --- | --- | --- | --- |
| **Age Adjusted Mortality Rate per 100,000 deaths (95% CI)** | | | | |
| **Year** | **Northeast** | **Midwest** | **South** | **West** |
| 1999 | 321.37(319.56-323.19) | 300.01(298.36-301.66) | 302.52(301.15-303.9) | 276.05(274.29-277.8) |
| 2000 | 309.51(307.74-311.27) | 286.96(285.36-288.57) | 293.81(292.46-295.15) | 258.72(257.04-260.4) |
| 2001 | 296.2(294.48-297.92) | 272.73(271.18-274.29) | 282.29(280.98-283.6) | 250.04(248.41-251.67) |
| 2002 | 289.42(287.73-291.1) | 263.09(261.57-264.61) | 273(271.72-274.28) | 242.85(241.26-244.44) |
| 2003 | 276.16(274.53-277.8) | 249.37(247.91-250.84) | 260.38(259.14-261.62) | 233.46(231.92-235) |
| 2004 | 255.53(253.96-257.1) | 231.26(229.85-232.66) | 241.47(240.29-242.65) | 215.22(213.76-216.68) |
| 2005 | 246.74(245.21-248.27) | 224.9(223.52-226.28) | 233.31(232.16-234.46) | 207.01(205.59-208.42) |
| 2006 | 228.57(227.1-230.03) | 212.45(211.12-213.78) | 215.56(214.47-216.64) | 196.37(195.01-197.73) |
| 2007 | 217.67(216.25-219.09) | 198.02(196.75-199.3) | 201.15(200.11-202.19) | 180.34(179.06-181.63) |
| 2008 | 213.16(211.76-214.55) | 196.64(195.38-197.9) | 194.71(193.7-195.73) | 174.35(173.1-175.59) |
| 2009 | 198.15(196.81-199.49) | 181.25(180.04-182.45) | 183.72(182.75-184.69) | 162.89(161.7-164.07) |
| 2010 | 187.07(185.77-188.36) | 177.38(176.2-178.56) | 178.88(177.93-179.83) | 156.24(155.09-157.39) |
| 2011 | 179.69(178.43-180.95) | 171.91(170.76-173.07) | 169.51(168.6-170.42) | 152.43(151.31-153.55) |
| 2012 | 171.82(170.6-173.04) | 167.67(166.53-168.8) | 165(164.12-165.89) | 145.17(144.1-146.25) |
| 2013 | 168.12(166.91-169.32) | 162.27(161.17-163.38) | 160.76(159.89-161.62) | 141.69(140.64-142.74) |
| 2014 | 160.46(159.3-161.63) | 157.58(156.5-158.67) | 156.31(155.47-157.15) | 133.93(132.93-134.94) |
| 2015 | 158.64(157.49-159.79) | 153.35(152.28-154.41) | 153.53(152.71-154.35) | 133.34(132.35-134.32) |
| 2016 | 154.05(152.92-155.19) | 148.39(147.35-149.43) | 148.42(147.62-149.22) | 130.93(129.97-131.9) |
| 2017 | 149.82(148.72-150.92) | 146.93(145.9-147.95) | 146.41(145.63-147.19) | 128.96(128.01-129.9) |
| 2018 | 148.57(147.48-149.66) | 144.56(143.55-145.57) | 143.11(142.34-143.87) | 123.92(123-124.83) |
| 2019 | 142.75(141.69-143.81) | 140.63(139.64-141.62) | 138.71(137.96-139.45) | 120.43(119.54-121.32) |
| 2020 | 151.13(150.04-152.22) | 145.8(144.8-146.8) | 144.45(143.7-145.2) | 125.5(124.59-126.4) |
| 2021 | 140.09(139.03-141.15) | 147.88(146.85-148.9) | 150.07(149.29-150.85) | 130.04(129.1-130.97) |
| 2022 | 132.89(131.88-133.9) | 141.52(140.54-142.5) | 140.2(139.47-140.93) | 123(122.12-123.88) |
| 2023 | 124.27(123.29-125.25) | 132.81(131.85-133.76) | 131.8(131.1-132.51) | 115.71(114.86-116.57) |

**Supplementary Table 12:** Age-adjusted mortality rates per 100,000 deaths stratified by Census Region in adults aged 25+ in the United States, 1999 to 2023

| **Table 13:** Age-adjusted mortality rates per 100,000 deaths stratified by urbanization in adults aged 25+ in the United States, 1999 to 2020 | | | | | | |
| --- | --- | --- | --- | --- | --- | --- |
| **Age Adjusted Mortality Rate per 100,000 deaths (95% CI)** | | | | | | |
| **Year** | **Large Central Metro** | **Large Fringe Metro** | **Medium Metro** | **Small Metro** | **Micropolitan (Nonmetro)** | **NonCore (Nonmetro)** |
| 1999 | 325.42(323.83-327.01) | 293.55(291.85-295.25) | 282.28(280.55-284) | 279.98(277.48-282.48) | 302.32(299.81-304.84) | 311.26(308.44-314.07) |
| 2000 | 308.85(307.31-310.4) | 282.81(281.16-284.47) | 270.34(268.66-272.02) | 271.79(269.34-274.24) | 294.51(292.04-296.98) | 300.22(297.47-302.98) |
| 2001 | 300.24(298.73-301.75) | 269.03(267.43-270.62) | 258.16(256.54-259.78) | 260.55(258.17-262.92) | 280.4(278-282.8) | 284.1(281.43-286.78) |
| 2002 | 287.78(286.31-289.25) | 260.9(259.35-262.45) | 251.03(249.44-252.61) | 252.98(250.65-255.3) | 274.56(272.2-276.93) | 281.97(279.31-284.62) |
| 2003 | 274.18(272.75-275.6) | 247.68(246.19-249.18) | 239.64(238.11-241.18) | 243.82(241.56-246.08) | 263.44(261.14-265.74) | 268.77(266.18-271.36) |
| 2004 | 255.29(253.93-256.66) | 227.74(226.32-229.15) | 221.95(220.49-223.41) | 224.91(222.76-227.07) | 243.09(240.89-245.28) | 250.41(247.92-252.9) |
| 2005 | 245.83(244.5-247.16) | 218.75(217.38-220.12) | 214.54(213.12-215.96) | 218.21(216.11-220.3) | 238.18(236.02-240.34) | 244.84(242.39-247.29) |
| 2006 | 230.52(229.24-231.8) | 204.11(202.81-205.42) | 198.99(197.63-200.34) | 204.98(202.97-206.99) | 223.76(221.68-225.84) | 227.68(225.32-230.03) |
| 2007 | 213.76(212.54-214.98) | 190.63(189.39-191.88) | 185.61(184.32-186.9) | 191.82(189.89-193.74) | 209.03(207.04-211.03) | 219.44(217.14-221.74) |
| 2008 | 206.51(205.33-207.7) | 185.72(184.51-186.94) | 181.05(179.79-182.32) | 187.32(185.44-189.21) | 207.55(205.58-209.53) | 218.73(216.45-221.02) |
| 2009 | 189.7(188.57-190.83) | 173.9(172.74-175.06) | 169.61(168.4-170.81) | 177.85(176.04-179.67) | 195.86(193.96-197.76) | 205.49(203.28-207.7) |
| 2010 | 179.7(178.61-180.79) | 168.08(166.95-169.21) | 164.77(163.59-165.95) | 175.26(173.47-177.05) | 190.92(189.05-192.79) | 200.24(198.07-202.41) |
| 2011 | 172.1(171.05-173.15) | 159.27(158.19-160.36) | 159.94(158.79-161.09) | 169.91(168.17-171.66) | 185.82(183.99-187.65) | 192.63(190.51-194.75) |
| 2012 | 165(163.98-166.02) | 152.09(151.04-153.13) | 155.88(154.76-157) | 164.55(162.85-166.25) | 181.71(179.91-183.51) | 189.55(187.45-191.64) |
| 2013 | 160.84(159.85-161.84) | 146.81(145.8-147.82) | 151.99(150.89-153.08) | 159.84(158.18-161.5) | 178.48(176.71-180.25) | 186.43(184.37-188.5) |
| 2014 | 152.39(151.43-153.35) | 140.76(139.79-141.74) | 148.12(147.05-149.19) | 153.95(152.33-155.56) | 174.67(172.92-176.41) | 182.35(180.31-184.39) |
| 2015 | 150.25(149.3-151.19) | 138.14(137.18-139.09) | 144.89(143.84-145.94) | 150.49(148.91-152.07) | 174.45(172.71-176.18) | 180.69(178.67-182.71) |
| 2016 | 145.66(144.75-146.58) | 133.7(132.77-134.63) | 141.43(140.4-142.45) | 146.66(145.11-148.21) | 168.32(166.63-170.01) | 175.8(173.82-177.79) |
| 2017 | 141.79(140.9-142.69) | 132.19(131.28-133.1) | 139.77(138.76-140.77) | 146.03(144.5-147.56) | 166.31(164.64-167.98) | 172.85(170.89-174.81) |
| 2018 | 139.22(138.34-140.09) | 128.82(127.93-129.71) | 136.27(135.29-137.25) | 144.44(142.93-145.95) | 163.36(161.72-165) | 168.04(166.12-169.96) |
| 2019 | 134.12(133.27-134.97) | 125.52(124.65-126.39) | 131.29(130.34-132.25) | 140.1(138.63-141.58) | 159.9(158.28-161.51) | 162.46(160.58-164.34) |
| 2020 | 144.03(143.15-144.9) | 128.47(127.6-129.34) | 136.13(135.17-137.1) | 145.39(143.9-146.88) | 164.67(163.03-166.3) | 170.7(168.77-172.63) |

**Supplementary Table 13:** AAge-adjustedmortality rates per 100,000 deaths stratified by urbanization in adults aged 25+ in the United States, 1999 to 2020
